# Supplementary material
Source: Springer Nature journal article supplement (https://www.springermedizin.de/resource/supplementary/12903_2014_392_MOESM8_ESM.pdf/9516936)
Supplement: MOESM8 [file 9516936]

Figure 6 – Key findings from review of dental literature on Patient-Centred Care

Key findings

- There is a lack of evidence to adequately understand PCC within dentistry.
- The evidence which is currently available on PCC in dentistry is not necessarily generalisable to general dental practice.
- Further research is necessary to understand the key features of PCC within general dental practice if we wish to use this as a quality indicator.
- Future research should ensure that a patient's perspective of PCC is adequately represented.
